# Supplementary material
Source: Elsevier journal article supplement (https://www.sciencedirect.com/science/article/pii/S113014061500042X)
Supplement: mmc1 [file S113014061500042X:mmc1.docx]

Comparative analysis of promoters PRB1 gene related with stress and nitrogen metabolism in promoter sequence from *S. cerevisiae* and of the three sequences of *C. glabrata.* <http://www.genomatix.de/>

| **Promoter/ Species** | ***S. cerevisiae*** | ***C. glabrata PRB1*** | ***C. glabrata PRB2*** | ***C. glabrata PRB3*** | **Function** |
| --- | --- | --- | --- | --- | --- |
| **F$YNIT** | 1 | 4 | 1 | 3 | Activator of nitrogen-regulated genes |
| **F$URS1** | 0 | 1 | 0 | 4 | Key regulator of nitrogen repression and meiotic |
| **F$GATA** | 2 | 2 | 0 | 1 | Negative regulator of genes in multiple nitrogen degradation pathways |
| **F$GATA** | 2 | 1 | 0 | 2 | Transcriptional regulator of nitrogen metabolism |
| **F$FBAS** | 4 | 4 | 0 | 0 | Fungi branched amino acid biosynthesis |
| **F$BAS1** | 0 | 1 | 0 | 0 | Transcription factor involved in the expression of genes encoding enzymes acting in histidine, purine, and pyrimidine biosynthetic pathways |
| **F$YHSF** | 2 | 3 | 0 | 2 | Yeast heat shock factors |
| **F$CSRE** | 3 | 3 | 0 | 2 | Carbon source-responsive elements |
| **F$YMIG** | 1 | 0 | 0 | 1 | MIG1, zinc finger protein mediates glucose repression |
| **F$YSTR** | 3 | 1 | 0 | 3 | Transcriptional activator for genes in multistress response |
| **F$SKN7** | 0 | 1 | 0 | 0 | SKN7, a transcription factor contributing to the oxidative stress response |
| **F$MREF** | 0 | 0 | 1 | 0 | Metal regulatory element factors |
| **F$SXBP** | 1 | 2 repr/ 2expr | 0 | 0 | Stress induced expression/ Stress-induced transcriptional repressor |
| **F$PHRR** | 1 | 1 | 0 | 0 | pH responsive regulators |
| **F$YRAP** | 2 | 5 | 0 | 0 | Yeast activator of glycolyse genes / repressor of mating type l |
| **F$YORE** | 0 | 2 | 0 | 3 | Yeast oleate response elements |
| **F$SREB** | 0 | 6 | 0 | 2 | Sterol regulatory element binding |
